# Supplementary material
Source: publisher site journal article supplement (https://www.spandidos-publications.com/4589/downloadSupplementary)

Figure S1. (A) RT-qPCR detected the expression levels of miR-34b-3p and miR-139-5p in A549 and H1650 cells transfected with miR-34b-3p mimics and miR-139-5p mimics. (B) RT-qPCR detected the expression levels of miR-34b-3p and miR-139-5p in A549 and H1650 cells transfected with miR-34b-3p inhibitor and miR-139-5p inhibitor. All experiments were conducted at least three times. \*\* $P < 0.01$ . RT-qPCR, reverse transcription-quantitative PCR; miR, microRNA.

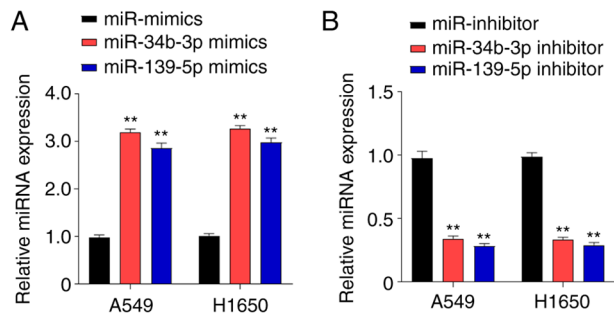

Supplement: Supplementary file 1 [file downloadSupplementary]
